# Supplementary material
Source: publisher figshare collection journal article supplement (https://rs.figshare.com/ndownloader/files/17842583)
Supplement: Supplementary file 1 [file 17842583]

10	0.99	0.99	1	-1	0.03	0.04	0.04	0.1	10	1	2156.1	0.08277
10	0.99	0.99	1	-1	0.03	0.04	0.04	0.5	10	1	2147.9	0.08386
10	0.99	0.99	1	-1	0.03	0.04	0.04	0.9	10	1	2140.8	0.08196
10	0.99	0.99	1	-1	0.03	0.04	0.2	0.5	10	1	2149.4	0.0839
10	0.99	0.99	1	-1	0.03	0.04	0.2	0.9	10	1	2139.4	0.08185
10	0.7	0.3	1	-1	0.03	0.04	0.2	0.1	10	1	61.578	0.09772
10	0.2	0.01	1	-1	0.03	0.04	0.8	0.1	10	1	49.279	0.09138
10	0.8	0.99	1	-1	0.03	0.04	0.8	0.5	10	1	180.23	0.10751
10	0.9	0.99	1	-1	0.03	0.04	0.8	0.9	10	1	331.44	0.08486
10	0.2	0.01	1	-1	0.03	0.04	1.2	0.1	10	1	47.273	0.0869
10	0.2	0.01	1	-1	0.03	0.04	1.6	0.1	10	1	45.946	0.08569
10	0.2	0.01	1	-1	0.03	0.04	2	0.1	10	1	44.366	0.08477
10	0.6	0.5	1	-1	0.03	0.04	1.2	0.5	10	1	60.902	0.12772
10	0.8	0.99	1	-1	0.03	0.04	1.2	0.9	10	1	146.18	0.08835
10	0.8	0.9	1	-1	0.03	0.04	1.6	0.9	10	1	114.06	0.11568
10	0.4	0.01	1	-1	0.03	0.04	1.6	0.5	10	1	44.663	0.12427
10	0.4	0.01	1	-1	0.03	0.04	2	0.5	10	1	42.881	0.11659
10	0.7	0.6	1	-1	0.03	0.04	2	0.9	10	1	61.397	0.13221
10	0.3	0.01	1	-1	0.03	0.04	0.4	0	10	1	47.949	0.08453
10	0.5	0.01	1	-1	0.03	0.04	0.4	0.1	10	1	47.259	0.09558
10	0.7	0.7	1	-1	0.03	0.04	0.4	0.2	10	1	88.978	0.10348
10	0.8	0.99	1	-1	0.03	0.04	0.4	0.3	10	1	190.81	0.09636
10	0.9	0.99	1	-1	0.03	0.04	0.4	0.4	10	1	372.08	0.08896
10	0.9	0.99	1	-1	0.03	0.04	0.4	0.5	10	1	360.65	0.08249
10	0.9	0.99	1	-1	0.03	0.04	0.4	0.6	10	1	350.06	0.07668
10	0.9	0.99	1	-1	0.03	0.04	0.4	0.7	10	1	338.76	0.07146
10	0.99	0.99	1	-1	0.03	0.04	0.4	0.8	10	1	2108.6	0.08314
10	0.99	0.99	1	-1	0.03	0.04	0.4	0.9	10	1	2133.1	0.0826
